# Supplementary material for: Preventive efficacy of NexGard Spectra® against Dipylidium caninum infection in dogs using a natural flea (Ctenocephalides felis) infestation model
Source: PubMed Central journal article supplement (PMC5432962; doi:10.1051/parasite/2017017), 2017-05-12
Supplement: parasite-24-16-s1.pdf [file parasite-24-16-s1.pdf]

## Supplementary Material

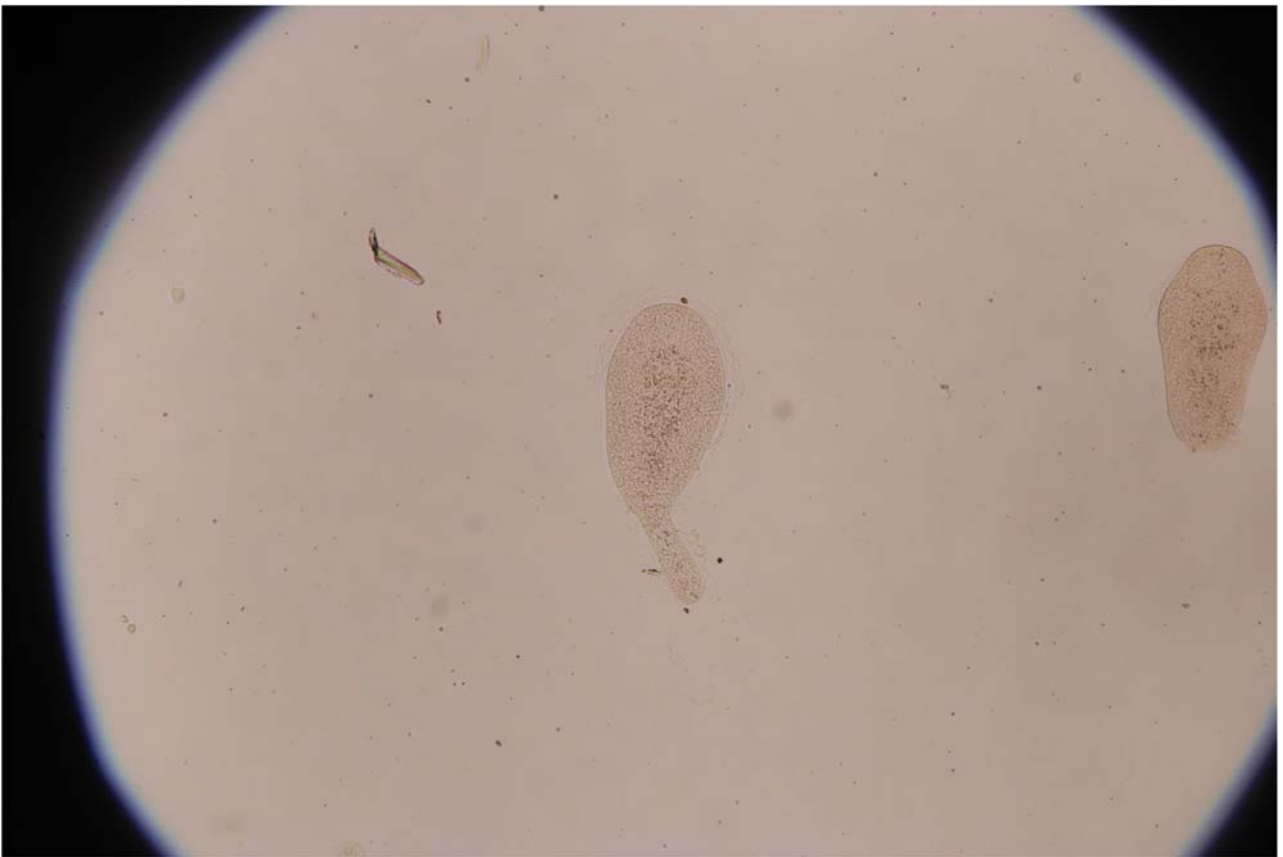

**Fig. S1.** Immature *Dipylidium caninum* metacystode observed after dissection of a newly emerged flea in water. The hexacanth hooks from the embryo migrate into a tail which is released. The metacystode thereafter appears ovoid. No suckers, no rostellum, and no hooklets are yet formed.

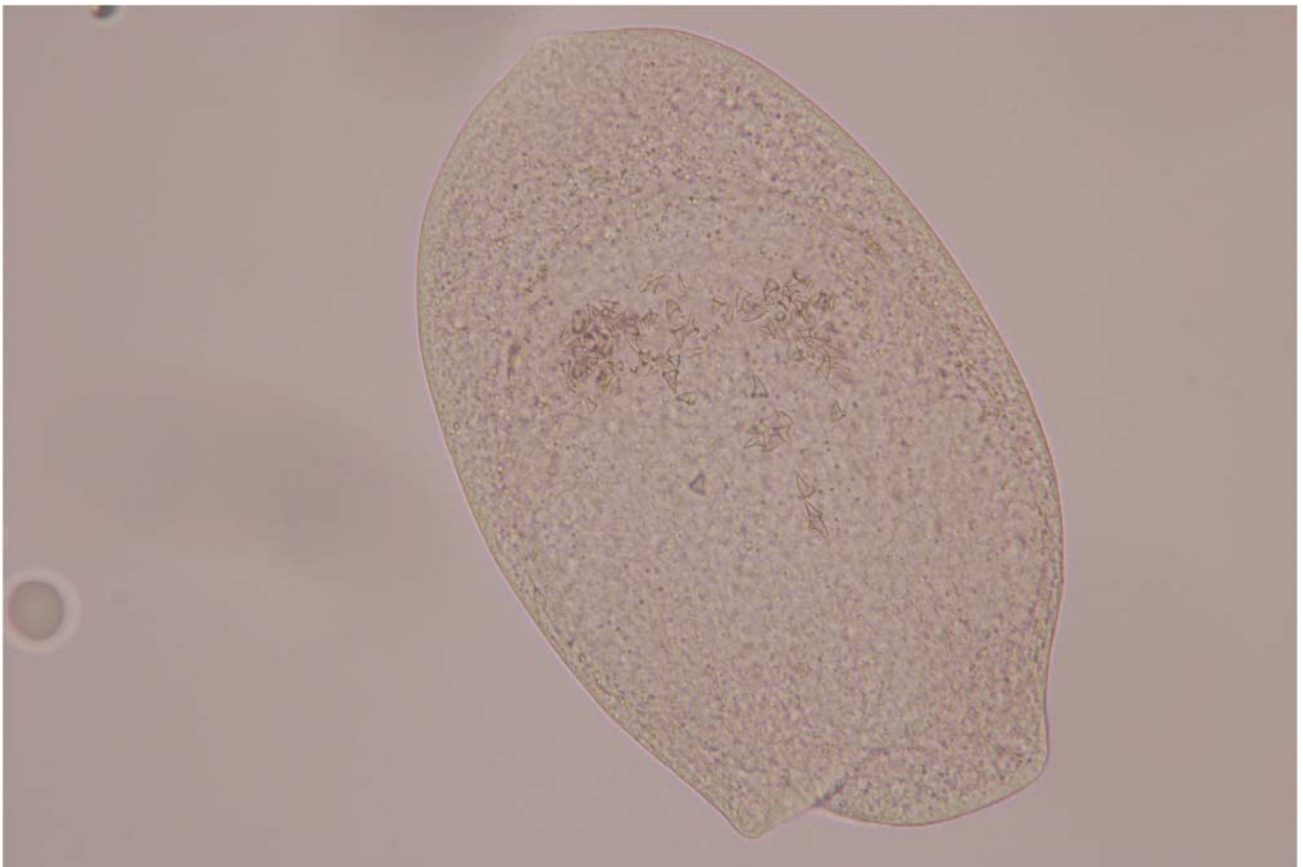

**Fig. S2.** Immature *Dipylidium caninum* metacystode in development, observed after dissection of a newly emerged flea. The suckers are in formation at one apex of the metacystode. The future hooklets appear in the middle of the larva.

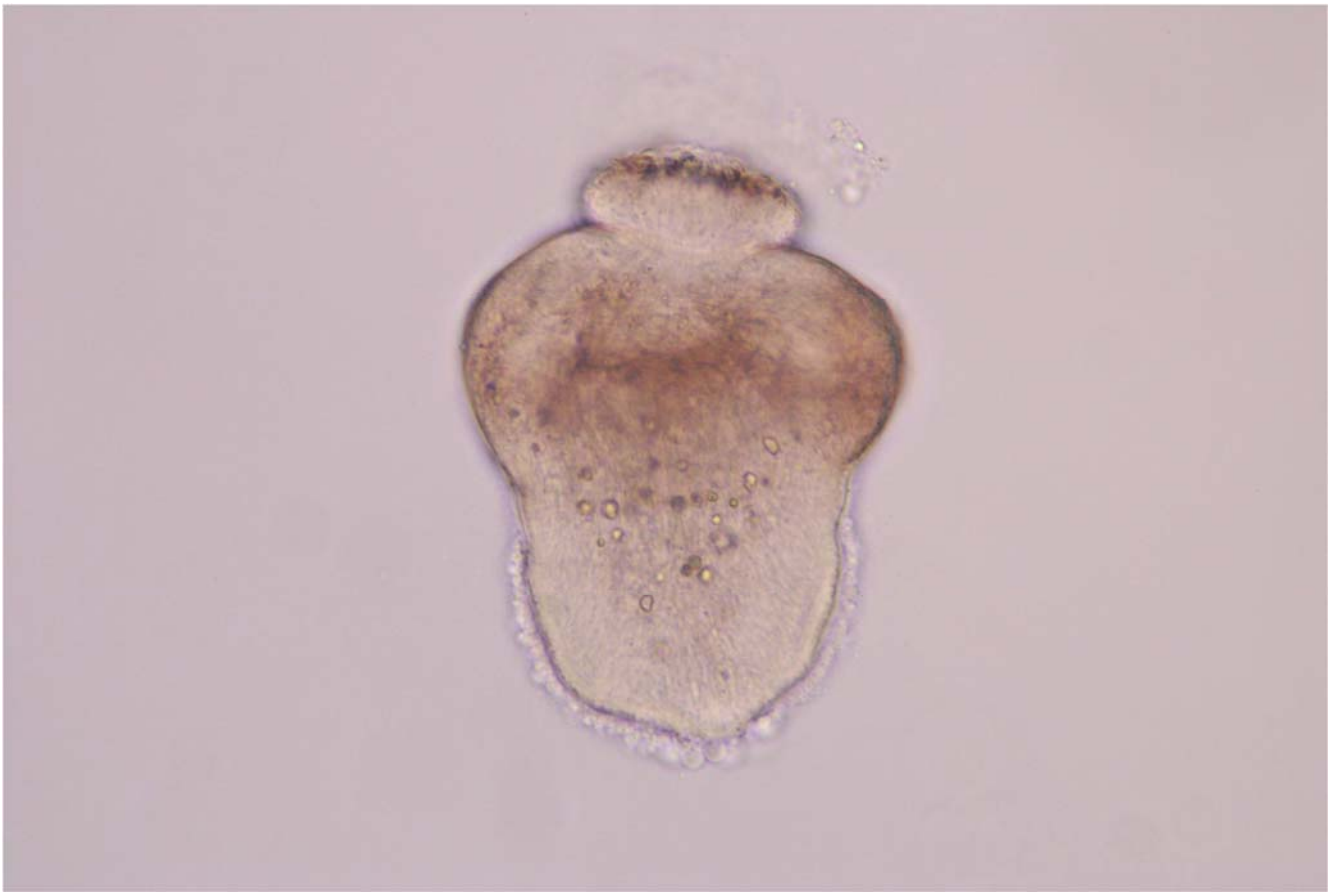

**Fig. S3.** Mature infective *Dipylidium caninum* metacystode, observed after dissection of a flea collected on the host after 36 hours. The rostellum with hooklets is everted. The suckers are clearly visible. This larval stage is infective for dogs and cats after ingestion.

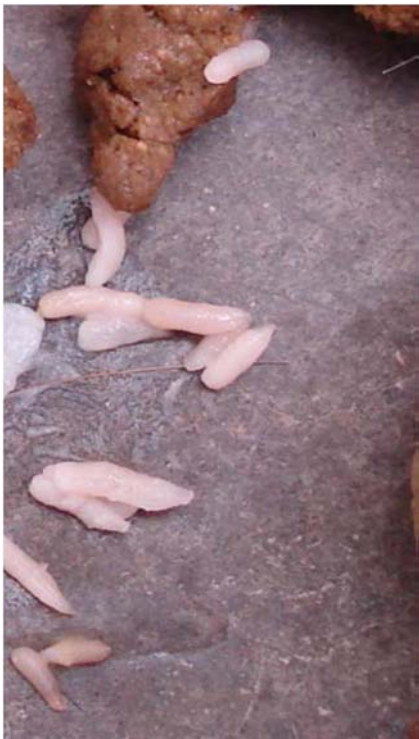

**Fig. S4.** *Dipylidium caninum* proglottids visible on dog faeces.

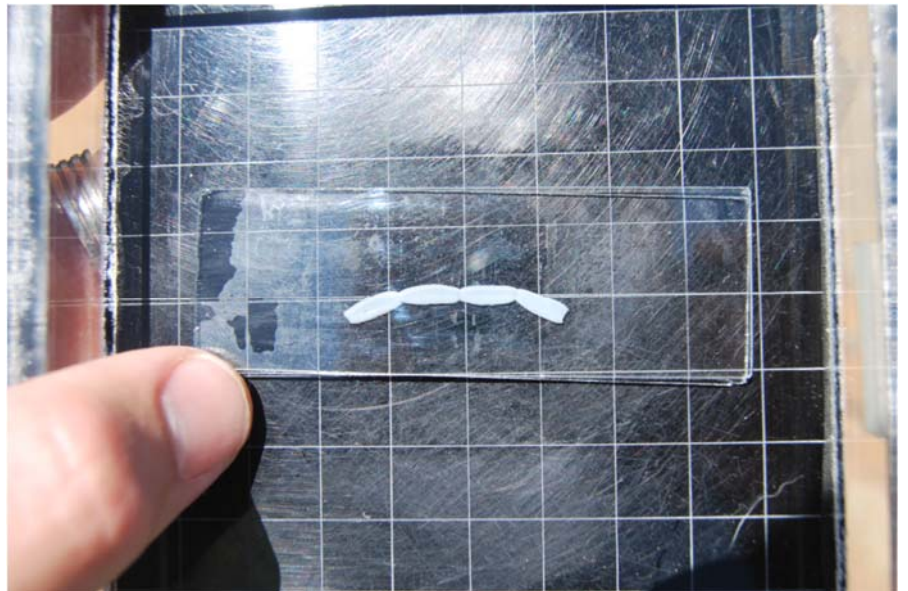

**Fig. S5.** *Dipylidium caninum* segments containing 4 proglottids recovered from the cage floor.
